# Supplementary material for: High SERPINH1 expression predicts poor prognosis in lung adenocarcinoma
Source: PubMed Central journal article supplement — J Thorac Dis. 2022 Dec;14(12):4785–802. doi: 10.21037/jtd-22-1518 (PMC9840017; doi:10.21037/jtd-22-1518), 2022-12
Supplement: jtd-14-12-4785-dss.pdf [file jtd-14-12-4785-dss.pdf]

## Data Sharing Statement

|                     |                                                                                                                                                     |                                                                                                                                              |
|---------------------|-----------------------------------------------------------------------------------------------------------------------------------------------------|----------------------------------------------------------------------------------------------------------------------------------------------|
| <b>Article Info</b> | <a href="https://dx.doi.org/10.21037/jtd-22-1518">https://dx.doi.org/10.21037/jtd-22-1518</a>                                                       |                                                                                                                                              |
| <b>Item</b>         | <b>Question</b>                                                                                                                                     | <b>Authors' Response<br/>(place "-" if not applicable)</b>                                                                                   |
| 1                   | Would you like to share data collected for your study to others?                                                                                    | Yes.                                                                                                                                         |
| 2                   | If not, would you like to share the reason for your decision?                                                                                       | -                                                                                                                                            |
| 3                   | What data in particular will be shared?                                                                                                             | I would like to share the information of the clinical samples of lung adenocarcinoma collected by Affiliated Hospital of Nantong University. |
| 4                   | Any other documents will be shared? Such as study protocol, statistical analysis plan, informed consent form, clinical study report, analytic code. | I would like to share the research protocol, statistical analysis protocol and analysis code if needed.                                      |
| 5                   | When will data availability begin?                                                                                                                  | From the publication date.                                                                                                                   |
| 6                   | When will data availability end?                                                                                                                    | Three years within the publication date.                                                                                                     |
| 7                   | To whom will you share the data?                                                                                                                    | Medical oncologists and lung surgeons who are interested in studies of SERPINH1.                                                             |
| 8                   | For what type of analysis or purpose?                                                                                                               | Further investigate the effect of SERPINH1 on lung adenocarcinoma.                                                                           |
| 9                   | How or where can the data/documents be obtained?                                                                                                    | Emails could be sent to the address below to obtain the shared data: 2549265914@qq.com                                                       |
| 10                  | Any other restrictions?                                                                                                                             | We may balance the potential benefits and risks for each request and then provide the data that could be shared.                             |
