# Supplementary material for: High SERPINH1 expression predicts poor prognosis in lung adenocarcinoma
Source: PubMed Central journal article supplement — J Thorac Dis. 2022 Dec;14(12):4785–802. doi: 10.21037/jtd-22-1518 (PMC9840017; doi:10.21037/jtd-22-1518), 2022-12
Supplement: jtd-14-12-4785-rc.pdf [file jtd-14-12-4785-rc.pdf]

## TRIPOD Checklist: Prediction Model Development and Validation

| Section                   | Item |     | Checklist description                                                                                                                                                                             | Reported on Page Number/Line Number                                                       | Reported on Section/Paragraph                                  |
|---------------------------|------|-----|---------------------------------------------------------------------------------------------------------------------------------------------------------------------------------------------------|-------------------------------------------------------------------------------------------|----------------------------------------------------------------|
| <b>Title and abstract</b> |      |     |                                                                                                                                                                                                   |                                                                                           |                                                                |
| Title                     | 1    | D;V | Identify the study as developing and/ or validating a multivariable prediction model, the target population, and the outcome to be predicted.                                                     | Page1/Line3                                                                               | Title                                                          |
| Abstract                  | 2    | D;V | Provide a summary of objectives, study design, setting, participants, sample size, predictors, outcome, statistical analysis, results, and conclusions.                                           | Page1/Line25-33<br>Page2/Line1-24                                                         | Abstract                                                       |
| <b>Introduction</b>       |      |     |                                                                                                                                                                                                   |                                                                                           |                                                                |
| Background and objectives | 3a   | D;V | Explain the medical context ( including whether diagnostic or prognostic) and rationale for developing or validating the multivariable prediction model, including references to existing models. | Page2/Line32-33<br>Page3/Line1-12<br>Page3/Line17-19<br>Page3/Line29-33<br>Page4/Line1-10 | Introduction/Para1<br>Introduction/Para2<br>Introduction/para4 |
|                           | 3b   | D;V | Specify the objectives, including whether the study describes the development or validation of the model or both.                                                                                 | Page4/Line18-21                                                                           | Introduction/Para6                                             |
| <b>Methods</b>            |      |     |                                                                                                                                                                                                   |                                                                                           |                                                                |
| Source of data            | 4a   | D;V | Describe the study design or source of data (e. g. , randomized trial, cohort, or registry data) , separately for the development and validation data sets, if applicable.                        | Page4/Line31-33<br>Page5/Line6-14                                                         | Method/Para1<br>Method/Para2                                   |
|                           | 4b   | D;V | Specify the key study dates, including start of accrual; end of accrual; and, if applicable, end of follow-up.                                                                                    | -                                                                                         |                                                                |
| Participants              | 5a   | D;V | Specify key elements of the study setting ( e. g. , primary care, secondary care, general population) including number and location of centres.                                                   | -                                                                                         |                                                                |
|                           | 5b   | D;V | Describe eligibility criteria for participants.                                                                                                                                                   | Page4/Line33<br>Page5/Line1-2<br>Page5/Line7-10                                           | Method/Para1<br>Method/Para2                                   |
|                           | 5c   | D;V | Give details of treatments received, if relevant.                                                                                                                                                 | -                                                                                         |                                                                |
| Outcome                   | 6a   | D;V | Clearly define the outcome that is predicted by the prediction model, including how and when assessed.                                                                                            | Page7/Line17-21                                                                           | Method/Para7                                                   |
|                           | 6b   | D;V | Report any actions to blind assessment of the outcome to be predicted.                                                                                                                            | -                                                                                         |                                                                |
| Predictors                | 7a   | D;V | Clearly define all predictors used in developing or validating the multivariable prediction model, including how and when they were measured.                                                     | -                                                                                         |                                                                |
|                           | 7b   | D;V | Report any actions to blind assessment of predictors for the outcome and other predictors.                                                                                                        | -                                                                                         |                                                                |
| Sample size               | 8    | D;V | Explain how the study size was arrived at.                                                                                                                                                        | -                                                                                         |                                                                |

|                              |     |     |                                                                                                                                                                                                        |                                                      |                                |
|------------------------------|-----|-----|--------------------------------------------------------------------------------------------------------------------------------------------------------------------------------------------------------|------------------------------------------------------|--------------------------------|
| Missing data                 | 9   | D;V | Describe how missing data were handled ( e. g. , complete- case analysis, single imputation, multiple imputation) with details of any imputation method.                                               | -                                                    |                                |
| Statistical analysis methods | 10a | D   | Describe how predictors were handled in the analyses.                                                                                                                                                  | -                                                    |                                |
|                              | 10b | D   | Specify type of model, all model- building procedures ( including any predictor selection) , and method for internal validation.                                                                       | Page6/Line20-31<br>Page7/Line3-13<br>Page7/Line17-25 | Method/Para5<br>Method/para6-7 |
|                              | 10c | V   | For validation, describe how the predictions were calculated.                                                                                                                                          | -                                                    |                                |
|                              | 10d | D;V | Specify all measures used to assess model performance and, if relevant, to compare multiple models.                                                                                                    | -                                                    |                                |
|                              | 10e | V   | Describe any model updating ( e. g. , recalibration) arising from the validation, if done.                                                                                                             | -                                                    |                                |
| Risk groups                  | 11  | D;V | Provide details on how risk groups were created, if done.                                                                                                                                              | -                                                    |                                |
| Development vs. validation   | 12  | V   | For validation, identify any differences from the development data in setting, eligibility criteria, outcome, and predictors.                                                                          | -                                                    |                                |
| <b>Results</b>               |     |     |                                                                                                                                                                                                        |                                                      |                                |
| Participants                 | 13a | D;V | Describe the flow of participants through the study, including the number of participants with and without the outcome and, if applicable, a summary of the follow- up time. A diagram may be helpful. | -                                                    |                                |
|                              | 13b | D;V | Describe the characteristics of the participants ( basic demographics, clinical features, available predictors) , including the number of participants with missing data for predictors and outcome.   |                                                      |                                |
|                              | 13c | V   | For validation, show a comparison with the development data of the distribution of important variables ( demographics, predictors and outcome) .                                                       | -                                                    |                                |
| Model development            | 14a | D   | Specify the number of participants and outcome events in each analysis.                                                                                                                                | Page10/Line2-9                                       | Result/Para2                   |
|                              | 14b | D   | If done, report the unadjusted association between each candidate predictor and outcome.                                                                                                               | -                                                    |                                |
| Model specification          | 15a | D   | Present the full prediction model to allow predictions for individuals ( i. e. , all regression coefficients, and model intercept or baseline survival at a given time point) .                        | Page10/Line22-24<br>Page11/Line1-3                   | Result/Para3                   |
|                              | 15b | D   | Explain how to the use the prediction model.                                                                                                                                                           | -                                                    |                                |
| Model performance            | 16  | D;V | Report performance measures ( with CIs) for the prediction model.                                                                                                                                      | -                                                    |                                |
| Model- updating              | 17  | V   | If done, report the results from any model updating ( i. e. , model specification, model performance) .                                                                                                | -                                                    |                                |
| <b>Discussion</b>            |     |     |                                                                                                                                                                                                        |                                                      |                                |
| Limitations                  | 18  | D;V | Discuss any limitations of the study ( such as nonrepresentative sample, few events per predictor, missing data) .                                                                                     | -                                                    | -                              |

|                           |     |     |                                                                                                                                                    |                                                                           |                    |
|---------------------------|-----|-----|----------------------------------------------------------------------------------------------------------------------------------------------------|---------------------------------------------------------------------------|--------------------|
| Interpretation            | 19a | V   | For validation, discuss the results with reference to performance in the development data, and any other validation data.                          | -                                                                         |                    |
|                           | 19b | D;V | Give an overall interpretation of the results, considering objectives, limitations, and results from similar studies, and other relevant evidence. | Page14/Line27-33<br>Page15/Line1-33<br>Page16/Line1-33<br>Page17/Line1-16 | Discussion/Para4-9 |
| Implications              | 20  | D;V | Discuss the potential clinical use of the model and implications for future research.                                                              | -                                                                         |                    |
| <b>Other information</b>  |     |     |                                                                                                                                                    |                                                                           |                    |
| Supplementary information | 21  | D;V | Provide information about the availability of supplementary resources, such as study protocol, Web calculator, and data sets.                      | -                                                                         | -                  |
| Funding                   | 22  | D;V | Give the source of funding and the role of the funders for the present study.                                                                      | Page17/Line29-31                                                          | Acknowledgments    |

\* Items relevant only to the development of a prediction model are denoted by D, items relating solely to a validation of a prediction model are denoted by V, and items relating to both are denoted D;V. We recommend using the TRIPOD Checklist in conjunction with the TRIPOD Explanation and Elaboration document.

Article information: <https://dx.doi.org/10.21037/jtd-22-1518>

\* As the checklist was provided upon initial submission, the page number/ line number reported may be changed due to copyediting and may not be referable in the published version. In this case, the section/ paragraph may be used as an alternative reference.
